# Supplementary material for: Mdm2 requires Sprouty4 to regulate focal adhesion formation and metastasis independent of p53
Source: PubMed Central journal article supplement — Nat Commun. 2024 Aug 20;15:7132. doi: 10.1038/s41467-024-51488-2 (PMC11336179; doi:10.1038/s41467-024-51488-2), 2024-08-20
Supplement: 41467_2024_51488_MOESM3_ESM.pdf [file 41467_2024_51488_MOESM3_ESM.pdf]

## Description of Additional Supplementary Files

**Supplementary Data 1:** Dataset regarding proteomics analysis performed in HT1080 p53KO cells treated with MEL23 or siRNAs against Mdm2. Full list of identified proteins and statistical analysis for each experimental condition.
